# Supplementary material for: Clostridioides difficile toxin A-mediated Caco-2 cell barrier damage was attenuated by insect-derived fractions and corresponded to increased gene transcription of cell junctional and proliferation proteins
Source: Royal Society of Chemistry journal article supplement (doi:10.1039/d1fo00673h), 2021-01-01

## Supplementary information

Table S1: Transcription of genes that are commonly or stimulation-specifically activated in Caco-2 cells after exposure to insect-fractions.

| Insects              | No. of genes | Genes                                                                                                                                                                                                                                                                                                                                                                                                                                                      |
|----------------------|--------------|------------------------------------------------------------------------------------------------------------------------------------------------------------------------------------------------------------------------------------------------------------------------------------------------------------------------------------------------------------------------------------------------------------------------------------------------------------|
| BCD BPD<br>BchPD MPD | 34           | HMGCR UGCG LMO7 TM4SF1 JUND<br>ARHGAP18 HSD3B1 DUSP6 PRELID3B ACSL3<br>CCL20 RSRC2 SQLE SPRED1 PCK1 NUDT4<br>ENC1 ZFP36L1 SC5D ARL5B BMP2 HMGCS1<br>EREG FAM107B TIPARP ACSL5 IDI1 AREG<br>SLC20A1 CYP1A1 SLC30A1 INSIG1 BET1<br>MSMO1                                                                                                                                                                                                                     |
| BPD                  | 23           | KRCC1 MT1F ENPP4 CDKN1A DENND4C<br>TCIM STAM CLDN4 ADM CD2AP PPP1R15B<br>CHTF8 CD55 MUC13 CCND1 BPNT2<br>MAPK11P1L TXNIP ERG28 MT-CYB PPTC7<br>JMJD1C ZFP36L2                                                                                                                                                                                                                                                                                              |
| BchPD                | 68           | SMIM24 PPP1CC YIPF6 MCM3 AZIN1 PTPRR<br>VMP1 FAM3C IER3 MTA2 CYCS INSIG2<br>HSPA13 MAP3K7 DDTL GGPS1 ARF6 ANP32E<br>TBCC CXADR TUBAL3 PEX13 RPL21 LYPLA1<br>SCOC PTBP3 RSL24D1 PPIL4 TMEM135<br>FOXN2 PRR15L PFDN4 LRRC19 PM20D2<br>TAF1D CETN3 TMED5 GCH1 CHMP1B XPO1<br>BLCAP ETNK1 NCOA7 ARFIP1 G0S2 CREBZF<br>NOP2 EIF2A UBE2B GLYCTK RNF128 TMF1<br>KCTD9 MCL1 PI4K2B PPIG SELENOI<br>TMEM106B GMFB BTG3 TST RPF2 PERP<br>RYBP GPBP1 CHMP2B NEK7 CLK1 |
| MPD                  | 34           | EMP1 RRAS2 CDC42SE1 EPB41L4B TSPAN12<br>AK3 HIGD1A DNAJA2 FAT1 CSTF2 FAM102A<br>SMIM3 MAF<br>TSKU ATF3 GPRC5A AKIRIN2 SNTB1 FGA<br>CPT1A EPAS1 KLF10 RHEB GNG10 AMACR<br>WDFY1 RESF1 TOB1 GOLIM4 OBI1 NCR3LG1<br>SLC46A1 NADK2 KLF4                                                                                                                                                                                                                        |
| BCD                  | 20           | BLOC1S5-TXNDC5 SOS1 GTF2A1 BMF<br>MAN1A1 PAXBP1 SLC35A3 SVIP RAB9A<br>ATP8B2 TRIM2 EDC3 C2orf72 ESF1 SLC5A3<br>DCDC2 MOB4 LYSMD3 GLRX SLC25A24                                                                                                                                                                                                                                                                                                             |

Table S2: Transcriptional changes (Fold changes compared to ED >1.6) in cell proliferation function-related genes following Caco-2 exposure to insect-derived fractions.

| <b>Gene acronym</b> | <b>Gene name</b>                                       | <b>BPD</b> | <b>BchPD</b> | <b>MPD</b> | <b>BCD</b> |
|---------------------|--------------------------------------------------------|------------|--------------|------------|------------|
| EREG                | epiregulin                                             | 3.13       | 3.84         | 2.74       | 1.97       |
| AREG                | amphiregulin                                           | 2.76       | 3.28         | 2.31       | 1.77       |
| GDF15               | growth differentiation factor 15                       | 2.17       | 2.70         | N.D        | N.D        |
| SLC20A1             | solute carrier family 20 member 1                      | 2.40       | 2.56         | 2.60       | 1.48       |
| JUND                | JunD proto-oncogene, AP-1 transcription factor subunit | 2.24       | 2.49         | 1.79       | 1.87       |
| BMP2                | bone morphogenetic protein 2                           | 2.16       | 2.44         | 2.32       | 1.45       |
| KLF6                | Kruppel like factor 6                                  | 2.10       | 2.36         | 1.43       | 1.37       |
| RND3                | Rho family GTPase 3                                    | 1.55       | 1.92         | 1.40       | N.D        |
| HMGB2               | high mobility group box 2                              | 1.42       | 1.83         | 1.41       | N.D        |
| JUN                 | Jun proto-oncogene, AP-1 transcription factor subunit  | 2.24       | 1.81         | N.D        | N.D        |
| TCIM                | transcriptional and immune response regulator          | 2.35       | N.D          | N.D        | N.D        |
| KLF4                | Kruppel like factor 4                                  | N.D        | N.D          | 2.04       | N.D        |
| FZD5                | frizzled class receptor 5                              | 1.54       | 1.76         | 1.69       | N.D        |
| GMFB                | glia maturation factor beta                            | 1.34       | 1.65         | 1.31       | 1.43       |
| ARHGAP18            | Rho GTPase activating protein 18                       | 1.57       | 1.63         | 1.53       | 1.59       |
| HBP1                | HMG-box transcription factor 1                         | 1.43       | 1.62         | 1.33       | N.D        |
| MAPK6               | mitogen-activated protein kinase 6                     | 1.42       | 1.60         | N.D        | 1.44       |
| KLF11               | Kruppel like factor 11                                 | 1.66       | 2.01         | 1.71       | N.D        |
| CCNL1               | cyclin L1                                              | 1.60       | 1.58         | 1.47       | 1.40       |
| RHOB                | ras homolog family member B                            | 1.89       | 1.37         | 1.98       | N.D        |
| RHPN2               | rhopilin Rho GTPase binding protein 2                  | 1.80       | 1.63         | 1.89       | N.D        |

Figure S1: Schematic overview of Caco-2 cells and THP-1 macrophages co-culture model.

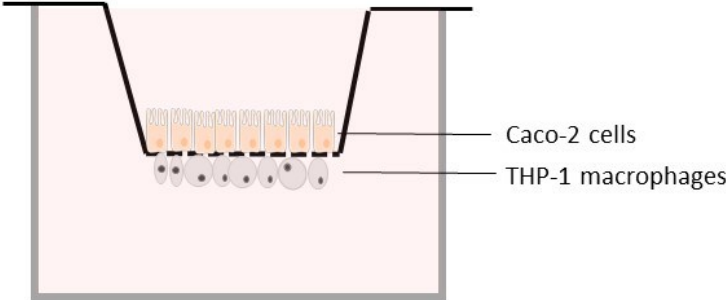

Figure S2: Post-treatment with insect-derived fractions did not significantly ( $p < 0.05$ ) reduce Caco-2 barrier damaging effect of *C. difficile*-derived toxin A.

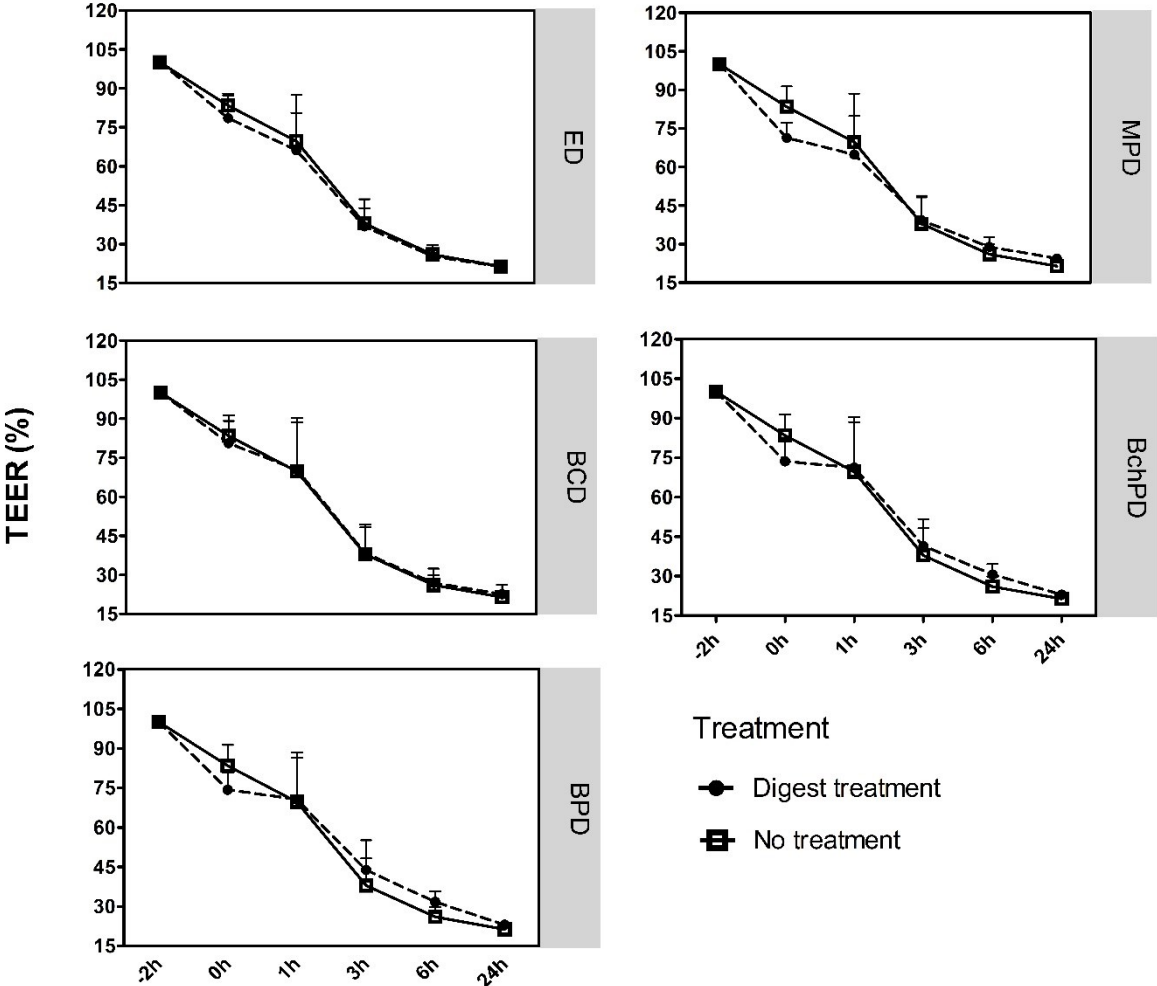

Supplement: d1fo00673h1.pdf [file d1fo00673h1.pdf]
